# Supplementary material
Source: HighWire-hosted journal article supplement (https://www.cmajopen.ca/highwire/filestream/80999/field_highwire_adjunct_files/3/open-2016-0161-4-at.pdf)

**Appendix 4 (as supplied by the authors): Full Base Case Cost-Effectiveness Results**

| <b>Genotype 1 Treatment-Naive Non-cirrhotic</b>     |            |             |                  |                   |           |                 |
|-----------------------------------------------------|------------|-------------|------------------|-------------------|-----------|-----------------|
| Treatment                                           | Total Cost | Total QALYs | Versus PR Alone  |                   |           | Sequential ICUR |
|                                                     |            |             | Incremental Cost | Incremental QALYs | ICUR      |                 |
| (0) no treatment                                    | \$104,904  | 9.734       | -                | -                 | -         | -               |
| (1) PR48                                            | \$114,132  | 10.839      | -                | -                 | -         | \$8,353         |
| (14) PAR/RIT12 + OMB12 + DAS12                      | \$143,379  | 11.835      | \$29,247         | 0.996             | \$29,354  | \$48,060        |
| (6) SOF12 + LDV12                                   | \$152,762  | 11.857      | \$38,631         | 1.018             | \$37,951  | \$435,528       |
| <b>Dominated or Extendedly Dominated Treatments</b> |            |             |                  |                   |           |                 |
| (46) B24 PR28-48 RGT                                | \$135,218  | 11.370      | \$21,086         | 0.531             | \$39,710  | ext. dominated  |
| (42) S112 PR24-48 RGT                               | \$136,770  | 11.449      | \$22,638         | 0.610             | \$37,106  | ext. dominated  |
| (32) T12 PR24-48 RGT q8                             | \$137,381  | 11.400      | \$23,250         | 0.561             | \$41,452  | dominated       |
| (15) PAR/RIT12 + OMB12 + DAS12 + RBV12              | \$146,021  | 11.841      | \$31,890         | 1.002             | \$31,823  | ext. dominated  |
| (40) So12 PR12                                      | \$146,140  | 11.651      | \$32,008         | 0.812             | \$39,431  | dominated       |
| (41) So12 PR24-48 RGT                               | \$150,969  | 11.589      | \$36,837         | 0.750             | \$49,113  | dominated       |
| (19) DAC12 + SOF12                                  | \$176,431  | 11.800      | \$62,300         | 0.961             | \$64,831  | dominated       |
| (5) SIM12 + SOF12                                   | \$178,356  | 11.700      | \$64,224         | 0.861             | \$74,582  | dominated       |
| (72) SOF12+ SIM12+RBV12                             | \$182,383  | 11.655      | \$68,251         | 0.816             | \$83,618  | dominated       |
| (4) SOF24 + RBV24                                   | \$201,979  | 11.497      | \$87,847         | 0.658             | \$133,509 | dominated       |
| <b>Genotype 1 Treatment-Naive Cirrhotic</b>         |            |             |                  |                   |           |                 |
| Treatment                                           | Total Cost | Total QALYs | Versus PR Alone  |                   |           | Sequential ICUR |
|                                                     |            |             | Incremental Cost | Incremental QALYs | ICUR      |                 |
| no treatment                                        | \$101,355  | 7.043       | -                | -                 | -         | -               |
| PR48                                                | \$120,140  | 8.659       | -                | -                 | -         | \$11,628        |
| SOF12 + LDV12                                       | \$169,483  | 10.538      | \$49,344         | 1.879             | \$26,261  | \$26,261        |
| <b>Dominated or Extendedly Dominated Treatments</b> |            |             |                  |                   |           |                 |
| SIM12 PR24-48 RGT                                   | \$149,012  | 9.557       | \$28,872         | 0.899             | \$32,123  | ext. dominated  |
| T12 PR24-48 RGT q8                                  | \$153,580  | 9.219       | \$33,441         | 0.561             | \$59,622  | dominated       |
| B24 PR28-48 RGT                                     | \$160,651  | 8.189       | \$40,512         | -0.470            | dominated | dominated       |
| SOF12 + PR12                                        | \$160,816  | 10.009      | \$40,676         | 1.351             | \$30,115  | ext. dominated  |
| SIM12 + SOF12                                       | \$193,471  | 10.212      | \$73,332         | 1.553             | \$47,208  | dominated       |
| SOF24 + RBV24                                       | \$214,699  | 9.636       | \$94,559         | 0.978             | \$96,723  | dominated       |

Appendix to: Wong WWL, Lee KM, Singh S, et al. Drug therapies for chronic hepatitis C infection: a cost-effectiveness analysis. *CMAJ Open* 2017. DOI:10.9778/cmajo.20160161. Copyright © 2017 The Author(s) or their employer(s).  
To receive this resource in an accessible format, please contact us at [cmajgroup@cmaj.ca](mailto:cmajgroup@cmaj.ca).

### Genotype 1: Treatment-Experienced Non-cirrhotic Patients

| Treatment                                                 | Total Cost | Total QALYs | Versus PR Alone  |                   |                | Sequential ICUR |
|-----------------------------------------------------------|------------|-------------|------------------|-------------------|----------------|-----------------|
|                                                           |            |             | Incremental Cost | Incremental QALYs | ICUR           |                 |
| no treatment                                              | \$104,668  | 9.596       | -                | -                 | -              | -               |
| PR48                                                      | \$118,321  | 10.282      | -                | -                 | -              | ext. dominated  |
| PAR/RIT12 + OMB12 + DAS12                                 | \$142,917  | 11.868      | \$24,597         | 1.586             | \$15,506       | \$16,836        |
| PAR/RIT12 + OMB12 + DAS12 + RBV12                         | \$145,743  | 11.898      | \$27,422         | 1.616             | \$16,965       | \$93,872        |
| <b>Other Dominated or Extendedly Dominated Treatments</b> |            |             |                  |                   |                |                 |
| SIM12 PR24-48 RGT                                         | \$138,660  | 11.169      | \$20,339         | 0.887             | \$22,918       | ext. dominated  |
| T12 PR48 q8                                               | \$142,464  | 11.394      | \$24,143         | 1.113             | \$21,702       | ext. dominated  |
| B32 PR36-48 RGT                                           | \$143,264  | 11.122      | \$24,943         | 0.841             | \$29,675       | dominated       |
| SIM12 PR48                                                | \$143,840  | 11.406      | \$25,519         | 1.124             | \$22,702       | dominated       |
| SOF12 + PR12                                              | \$150,153  | 11.471      | \$31,833         | 1.189             | \$26,770       | dominated       |
| SOF12 + LDV12                                             | \$154,321  | 11.761      | \$36,001         | 1.480             | \$24,329       | dominated       |
| SIM12 + SOF12 +RBV12                                      | \$186,875  | 11.046      | \$68,554         | 0.765             | \$89,659       | dominated       |
| SIM12 + SOF12                                             | \$189,079  | 10.280      | \$70,758         | -0.001            | abs. dominated | dominated       |

### Genotype 1: Treatment-Experienced Cirrhotic Patients

| Treatment                                           | Total Cost | Total QALYs | Versus PR Alone  |                   |          | Sequential ICUR |
|-----------------------------------------------------|------------|-------------|------------------|-------------------|----------|-----------------|
|                                                     |            |             | Incremental Cost | Incremental QALYs | ICUR     |                 |
| no treatment                                        | \$101,355  | 7.043       | -                | -                 | -        | -               |
| PR48                                                | \$119,828  | 7.924       | -                | -                 | -        | ext. dominated  |
| SIM12 PR24-48 RGT                                   | \$148,780  | 9.326       | \$28,953         | 1.402             | \$20,655 | \$20,774        |
| SOF12 + LDV12 + RBV12                               | \$172,976  | 9.933       | \$53,148         | 2.009             | \$26,456 | \$39,845        |
| SIM12 + SOF12                                       | \$193,052  | 9.966       | \$73,225         | 2.041             | \$35,870 | \$618,881       |
| <b>Dominated or Extendedly Dominated Treatments</b> |            |             |                  |                   |          |                 |
| B32 PR36-48 RGT                                     | \$153,492  | 8.758       | \$33,664         | 0.834             | \$40,357 | dominated       |
| T12 PR48 q8                                         | \$153,691  | 9.046       | \$33,863         | 1.122             | \$30,190 | dominated       |
| SIM12 PR48                                          | \$154,912  | 8.879       | \$35,084         | 0.954             | \$36,757 | dominated       |
| SOF 12 + PR12                                       | \$162,499  | 8.941       | \$42,671         | 1.017             | \$41,954 | dominated       |
| SOF24 + LDV24                                       | \$234,378  | 9.887       | \$114,550        | 1.962             | \$58,371 | dominated       |

**Genotype 2: Treatment-Naive Non-cirrhotic Patients**

| Treatment                   | Total Cost | Total QALYs | Versus PR Alone  |                   |           | Sequential ICUR |
|-----------------------------|------------|-------------|------------------|-------------------|-----------|-----------------|
|                             |            |             | Incremental Cost | Incremental QALYs | ICUR      |                 |
| PR24                        | \$99,904   | 11.532      | -                | -                 | -         | -               |
| SOF12 + RBV12               | \$143,955  | 11.749      | \$44,051         | 0.217             | \$203,282 | \$203,282       |
| <b>Dominated treatments</b> |            |             |                  |                   |           |                 |
| no treatment                | \$104,904  | 9.734       | \$5,000          | -1.798            | dominated | dominated       |
| SOF12 + PR12                | \$145,731  | 11.698      | \$45,827         | 0.166             | \$276,103 | dominated       |

**Genotype 2: Treatment-Naive cirrhotic Patients**

| Treatment     | Total Cost | Total QALYs | Versus PR Alone  |                   |          | Sequential ICUR |
|---------------|------------|-------------|------------------|-------------------|----------|-----------------|
|               |            |             | Incremental Cost | Incremental QALYs | ICUR     |                 |
| no treatment  | \$101,355  | 7.043       | -                | -                 | -        | -               |
| PR24          | \$112,767  | 9.384       | -                | -                 | -        | \$4,876         |
| SOF12 + RBV12 | \$159,541  | 10.181      | \$46,773         | 0.797             | \$58,659 | \$58,659        |

**Genotype 2: Treatment-Experienced Non-cirrhotic Patients**

| Treatment                   | Total Cost | Total QALYs | Versus No Treatment |                   |          | Sequential ICUR |
|-----------------------------|------------|-------------|---------------------|-------------------|----------|-----------------|
|                             |            |             | Incremental Cost    | Incremental QALYs | ICUR     |                 |
| no treatment                | \$104,668  | 9.596       | -                   | -                 | -        | -               |
| SOF12 + RBV12               | \$144,023  | 11.753      | \$39,355            | 2.157             | \$18,247 | \$18,247        |
| <b>Dominated Treatments</b> |            |             |                     |                   |          |                 |
| SOF12 + PR12                | \$145,460  | 11.689      | \$40,791            | 2.092             | \$19,494 | dominated       |

**Genotype 2: Treatment-Experienced Cirrhotic Patients**

| Treatment                                           | Total Cost | Total QALYs | Versus No Treatment |                   |          | Sequential ICUR |
|-----------------------------------------------------|------------|-------------|---------------------|-------------------|----------|-----------------|
|                                                     |            |             | Incremental Cost    | Incremental QALYs | ICUR     |                 |
| no treatment                                        | \$101,355  | 7.043       | -                   | -                 | -        | -               |
| SOF12 + PR12                                        | \$160,863  | 10.308      | \$59,508            | 3.265             | \$18,226 | \$18,226        |
| <b>Dominated or Extendedly Dominated Treatments</b> |            |             |                     |                   |          |                 |
| SOF12 + RBV12                                       | \$159,347  | 9.761       | \$57,992            | 2.718             | \$21,338 | ext. dominated  |
| SOF16 + RBV16                                       | \$177,502  | 9.896       | \$76,147            | 2.853             | \$26,694 | dominated       |

### Genotype 3: Treatment-Naive Non-cirrhotic Patients

| Treatment                                           | Total Cost | Total QALYs | Versus PR Alone  |                   |           | Sequential ICUR |
|-----------------------------------------------------|------------|-------------|------------------|-------------------|-----------|-----------------|
|                                                     |            |             | Incremental Cost | Incremental QALYs | ICUR      |                 |
| no treatment                                        | \$104,183  | 9.314       | -                | -                 | -         | -               |
| PR48                                                | \$110,387  | 11.156      | -                | -                 | -         | \$3,367         |
| DCV12 + SOF12                                       | \$175,987  | 11.832      | \$65,600         | 0.675             | \$97,158  | \$97,158        |
| <b>Dominated or Extendedly Dominated Treatments</b> |            |             |                  |                   |           |                 |
| SOF24 + RBV24                                       | \$199,738  | 11.734      | \$89,351         | 0.578             | \$154,599 | dominated       |

### Genotype 3: Treatment-Naive cirrhotic Patients

| Treatment     | Total Cost | Total QALYs | Versus PR Alone  |                   |          | Sequential ICUR |
|---------------|------------|-------------|------------------|-------------------|----------|-----------------|
|               |            |             | Incremental Cost | Incremental QALYs | ICUR     |                 |
| no treatment  | \$101,355  | 7.043       | -                | -                 | -        | -               |
| PR48          | \$120,843  | 9.335       | -                | -                 | -        | \$8,504         |
| SOF24 + RBV24 | \$215,437  | 10.362      | \$94,594         | 1.027             | \$92,117 | \$92,117        |

### Genotype 3: Treatment-Experienced Non-cirrhotic Patients

| Treatment                                           | Total Cost | Total QALYs | Versus No Treatment |                   |          | Sequential ICUR |
|-----------------------------------------------------|------------|-------------|---------------------|-------------------|----------|-----------------|
|                                                     |            |             | Incremental Cost    | Incremental QALYs | ICUR     |                 |
| no treatment                                        | \$103,932  | 9.167       | -                   | -                 | -        | -               |
| PR48                                                | \$112,301  | 10.879      | \$8,368             | 1.712             | \$4,888  | \$4,888         |
| SOF12 + PR12                                        | \$149,249  | 11.510      | \$45,316            | 2.343             | \$19,339 | \$58,535        |
| DCV12 + SOF12                                       | \$177,476  | 11.780      | \$73,544            | 2.612             | \$28,151 | \$104,857       |
| <b>Dominated or Extendedly Dominated Treatments</b> |            |             |                     |                   |          |                 |
| SOF24 + RBV24                                       | \$200,324  | 11.637      | \$96,392            | 2.470             | \$39,025 | dominated       |

### Genotype 3: Treatment- Experienced cirrhotic Patients

| Treatment     | Total Cost | Total QALYs | Versus No Treatment |                   |          | Sequential ICUR |
|---------------|------------|-------------|---------------------|-------------------|----------|-----------------|
|               |            |             | Incremental Cost    | Incremental QALYs | ICUR     |                 |
| no treatment  | \$101,355  | 7.043       |                     |                   |          | -               |
| PR48          | \$120,880  | 8.936       | \$19,525            | 1.893             | \$10,317 | \$10,317        |
| SOF12 + PR12  | \$163,647  | 10.082      | \$62,292            | 3.039             | \$20,496 | \$37,319        |
| SOF24 + RBV24 | \$214,706  | 9.661       | \$113,351           | 2.618             | \$43,292 | Dominated       |

### Genotype 4: Treatment-Naive Non-cirrhotic Patients

| Treatment                                           | Total Cost | Total QALYs | Versus PR alone  |                   |           | Sequential ICUR |
|-----------------------------------------------------|------------|-------------|------------------|-------------------|-----------|-----------------|
|                                                     |            |             | Incremental Cost | Incremental QALYs | ICUR      |                 |
| <b>Genotype 4 Treatment-Naive Non-cirrhotic</b>     |            |             |                  |                   |           |                 |
| no treatment                                        | \$104,904  | 9.734       | -                | -                 | -         | -               |
| PR48                                                | \$111,493  | 11.158      | -                | -                 | -         | \$4,627         |
| SOF12 + PR12                                        | \$145,731  | 11.698      | \$34,239         | 0.540             | \$63,421  | \$63,421        |
| <b>Dominated or Extendedly Dominated Treatments</b> |            |             |                  |                   |           |                 |
| SOF24 + RBV24                                       | \$201,602  | 11.543      | \$90,110         | 0.385             | \$234,310 | dominated       |

### Genotype 4: Treatment-Naive Cirrhotic Patients

| Treatment     | Total Cost | Total QALYs | Versus PR Alone  |                   |          | Sequential ICUR |
|---------------|------------|-------------|------------------|-------------------|----------|-----------------|
|               |            |             | Incremental Cost | Incremental QALYs | ICUR     |                 |
| no treatment  | \$101,355  | 7.043       | -                | -                 | -        | -               |
| PR48          | \$120,087  | 8.608       | -                | -                 | -        | \$11,970        |
| SOF24 + RBV24 | \$215,281  | 10.208      | \$95,194         | 1.600             | \$59,492 | \$59,492        |

### Genotype 4: Treatment-Experienced Non-cirrhotic Patients

| Treatment     | Total Cost | Total QALYs | Versus No Treatment |                   |          |
|---------------|------------|-------------|---------------------|-------------------|----------|
|               |            |             | Incremental Cost    | Incremental QALYs | ICUR     |
| no treatment  | \$104,668  | 9.596       | -                   | -                 | -        |
| SOF24 + RBV24 | \$201,763  | 11.503      | \$97,095            | 1.907             | \$50,913 |

### Genotype 4: Treatment-Experienced: Cirrhotic Patients

| Treatment     | Total Cost | Total QALYs | Versus No Treatment |                   |          |
|---------------|------------|-------------|---------------------|-------------------|----------|
|               |            |             | Incremental Cost    | Incremental QALYs | ICUR     |
| no treatment  | \$101,355  | 7.043       | -                   | -                 | -        |
| SOF24 + RBV24 | \$215,142  | 10.093      | \$113,787           | 3.050             | \$37,303 |

Appendix Figure A1: Result of Sensitivity Analyses: Tornado Diagrams

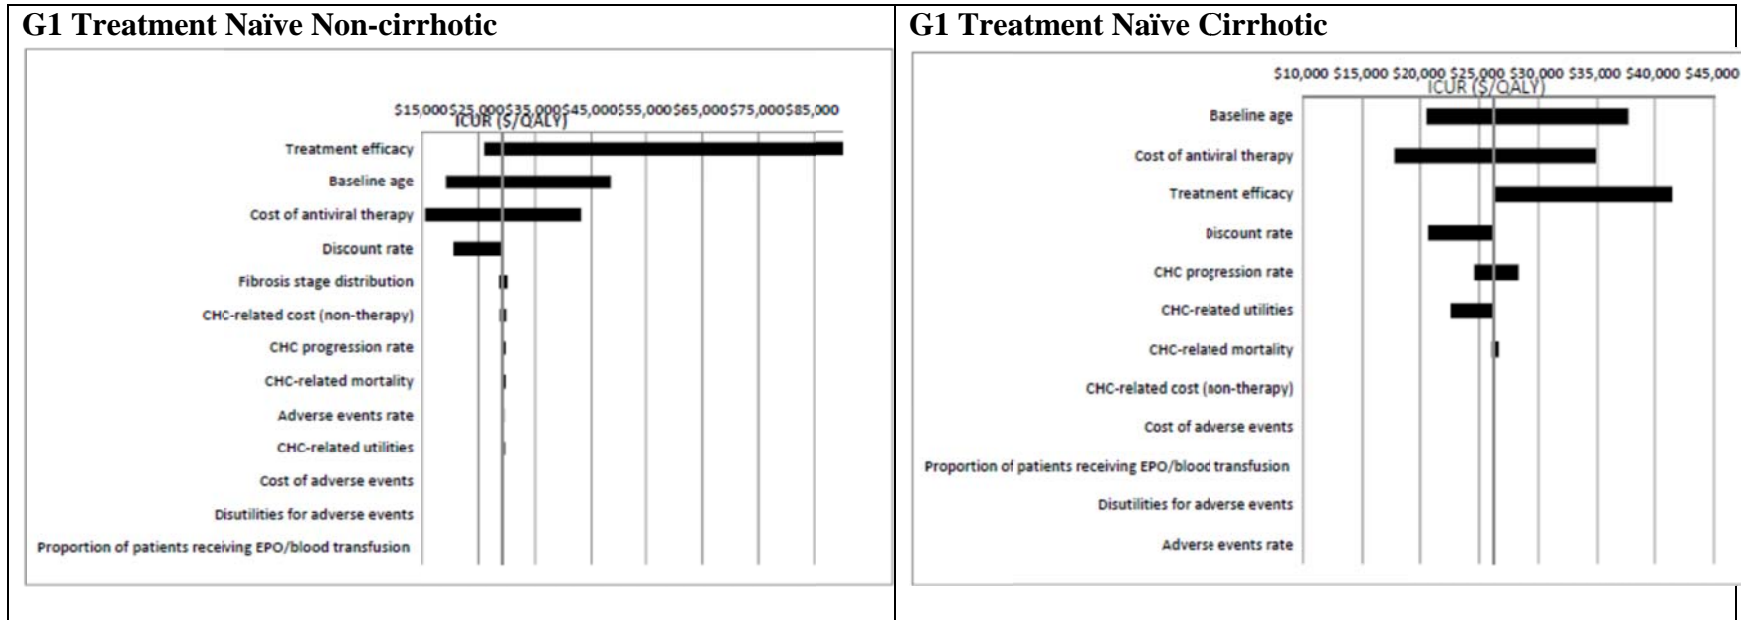

### G1 Treatment Experienced Non-cirrhotic

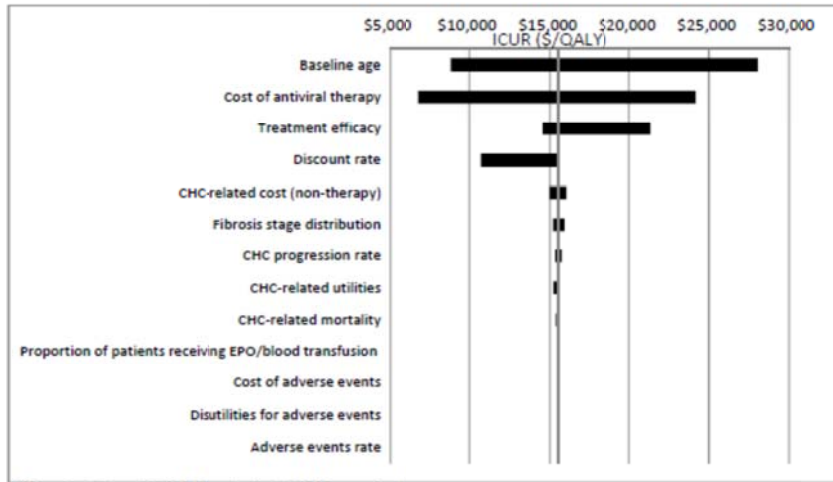

### G1 Treatment Experienced Cirrhotic

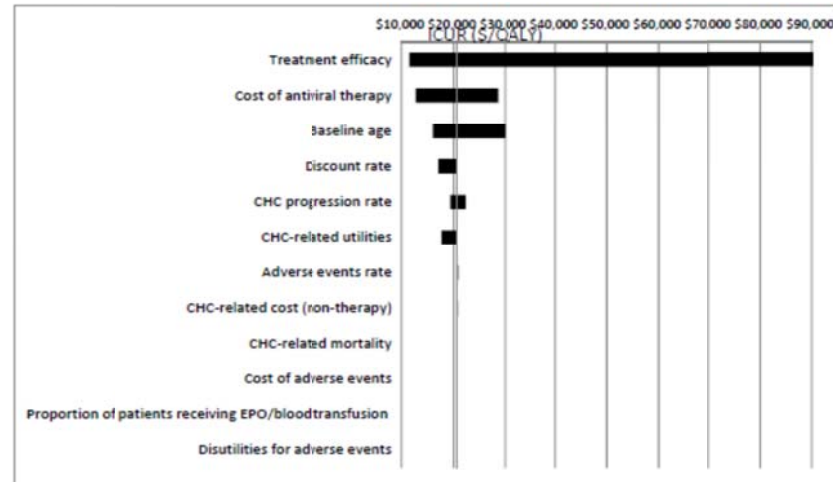

### G2 Treatment Naïve Non-cirrhotic

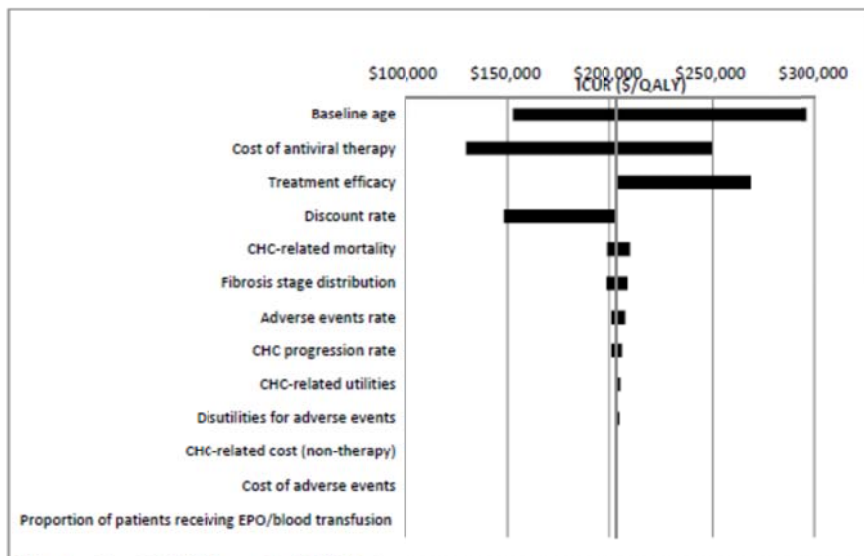

### G2 Treatment Naïve Cirrhotic

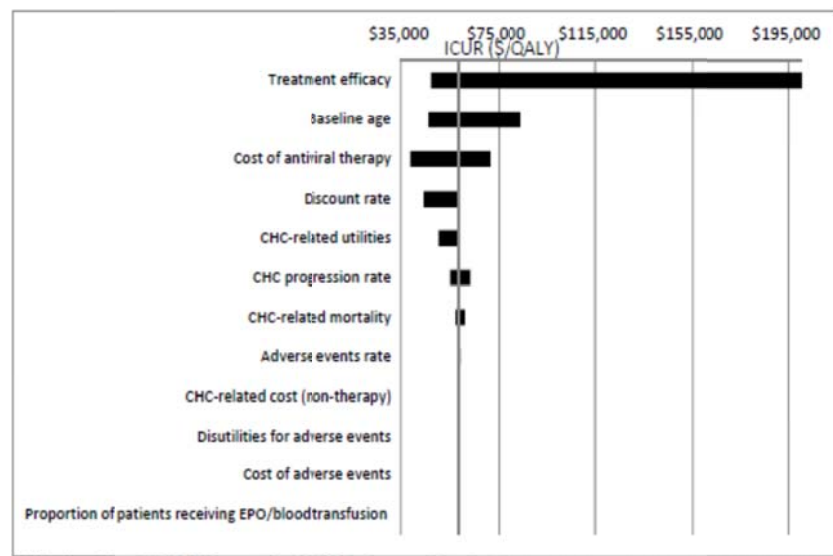

### G2 Treatment Experienced Non-cirrhotic

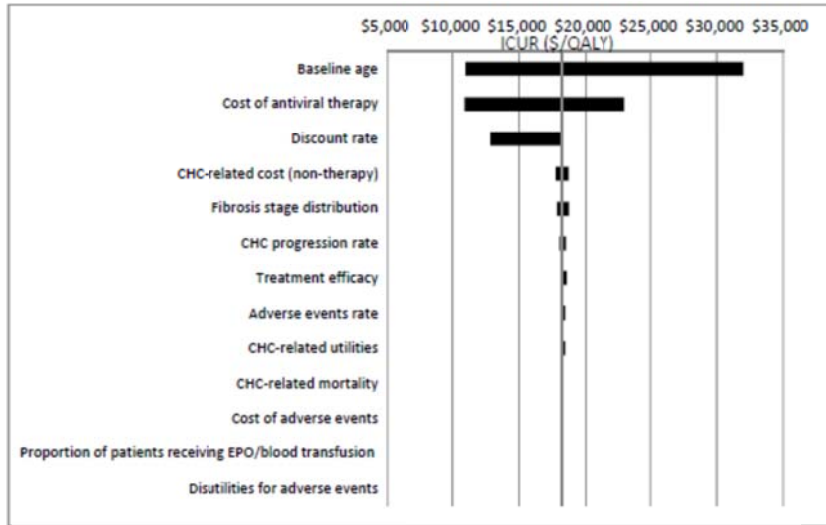

### G2 Treatment Experienced Cirrhotic

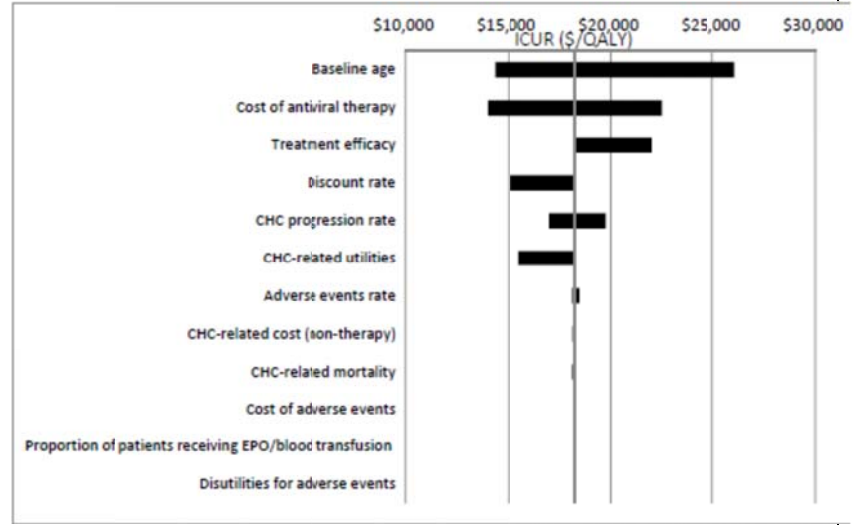

### G3 Treatment Naïve Non-cirrhotic

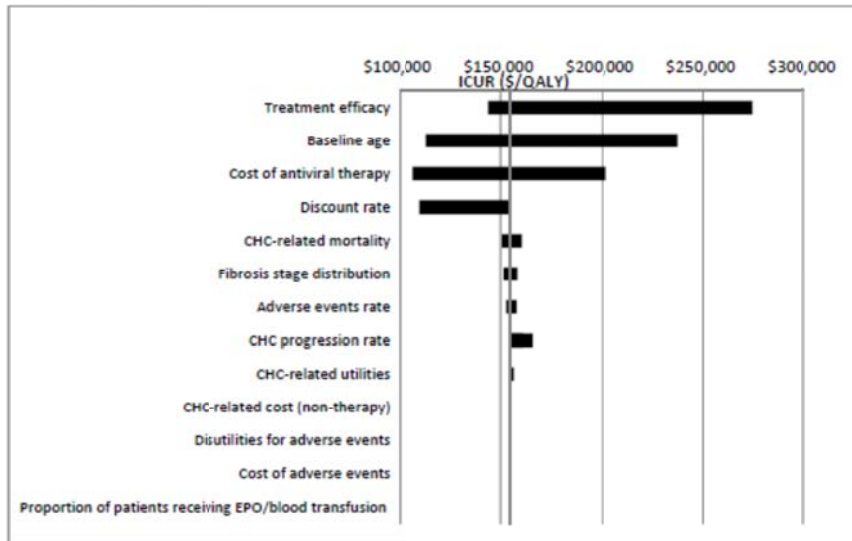

### G3 Treatment Naïve Cirrhotic

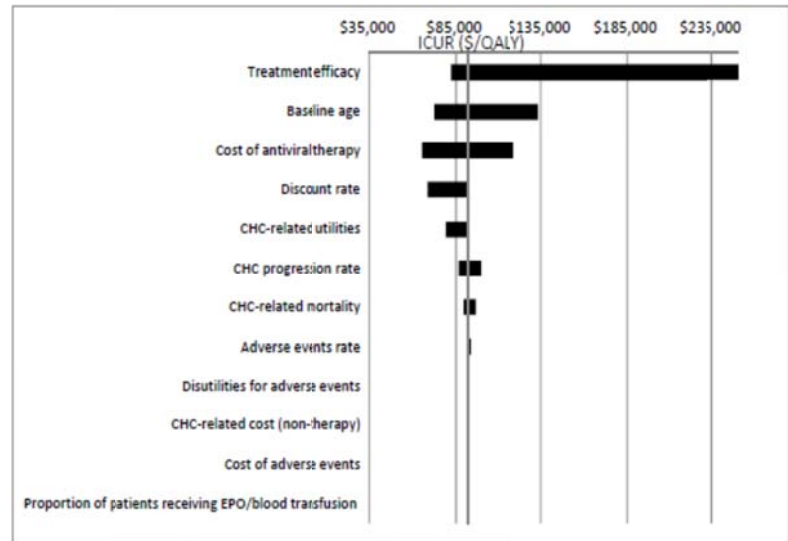



### G3 Treatment Experienced Non-cirrhotic

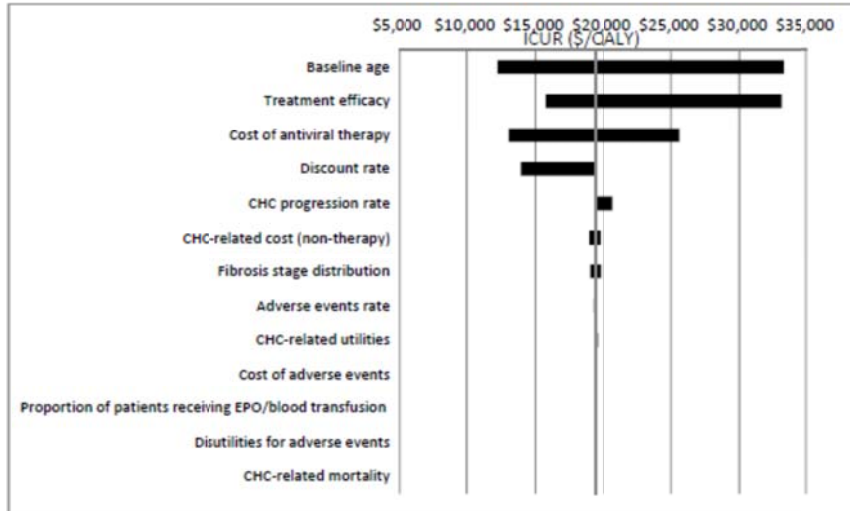

### G3 Treatment Experienced Cirrhotic

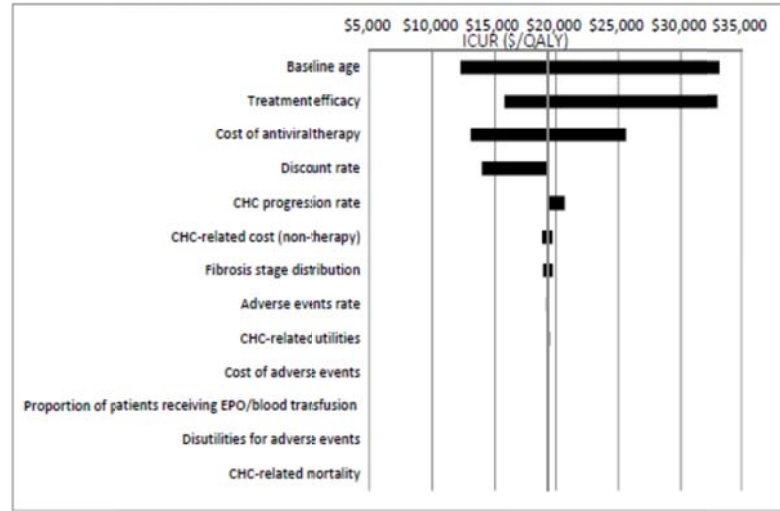

### G4 Treatment Naïve Non-cirrhotic

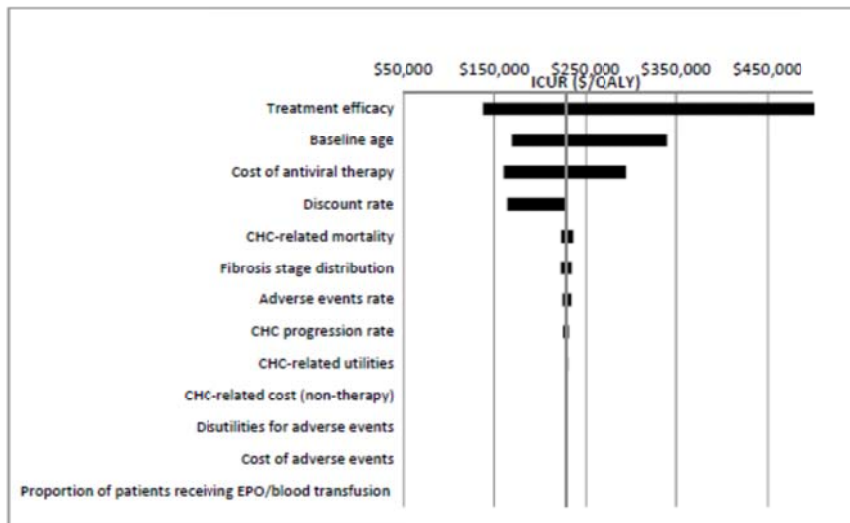

### G4 Treatment Naïve Cirrhotic

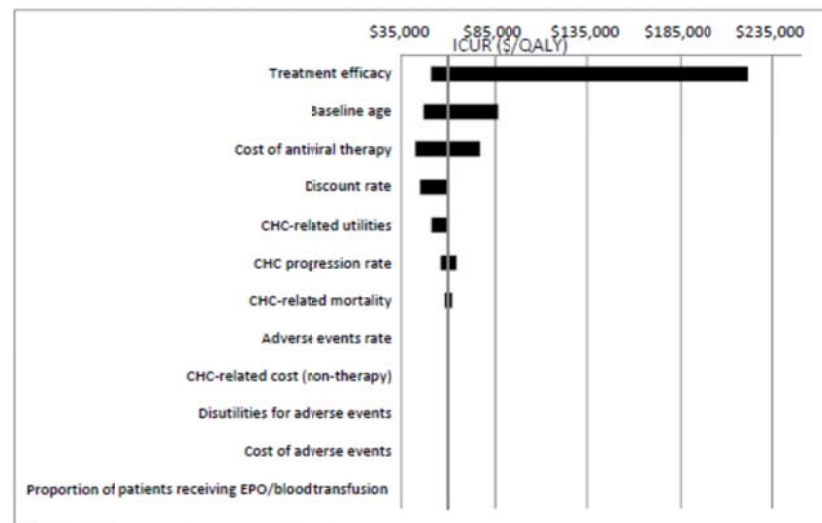

### G4 Treatment Experienced Non-cirrhotic

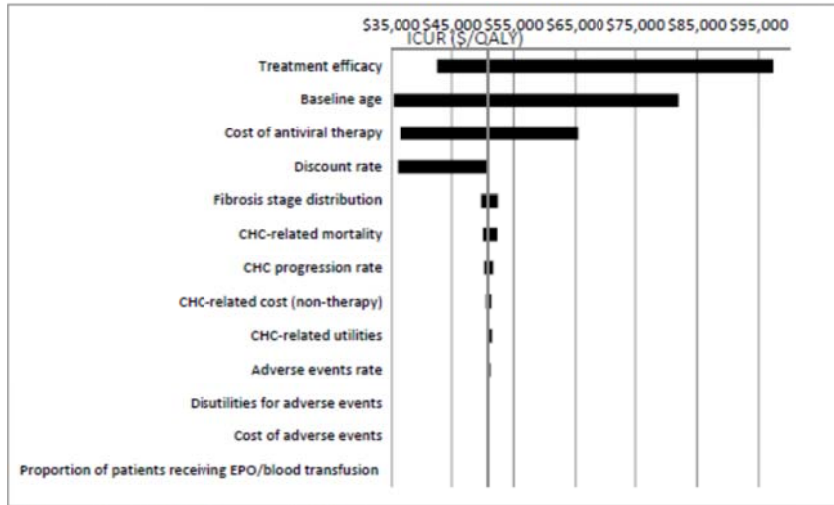

### G4 Treatment Experienced Cirrhotic

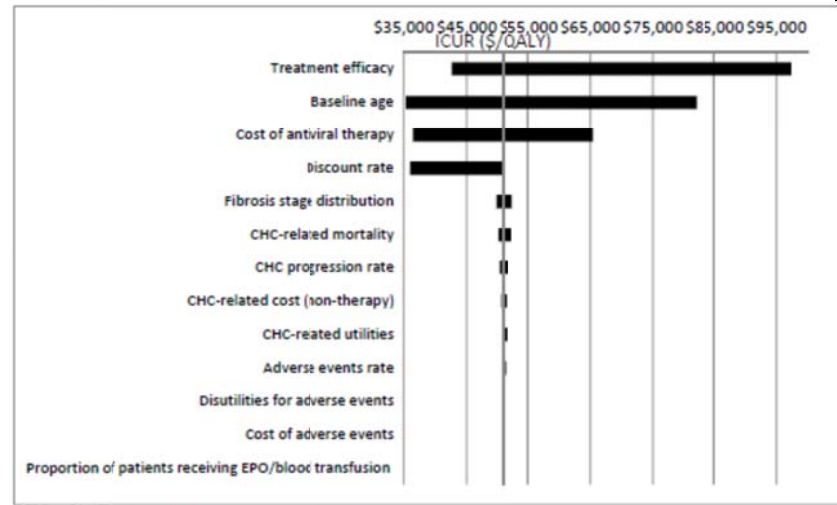

Appendix Figure A2: Result of Sensitivity Analyses: Acceptability Curve

G1 Treatment Naïve Non-cirrhotic

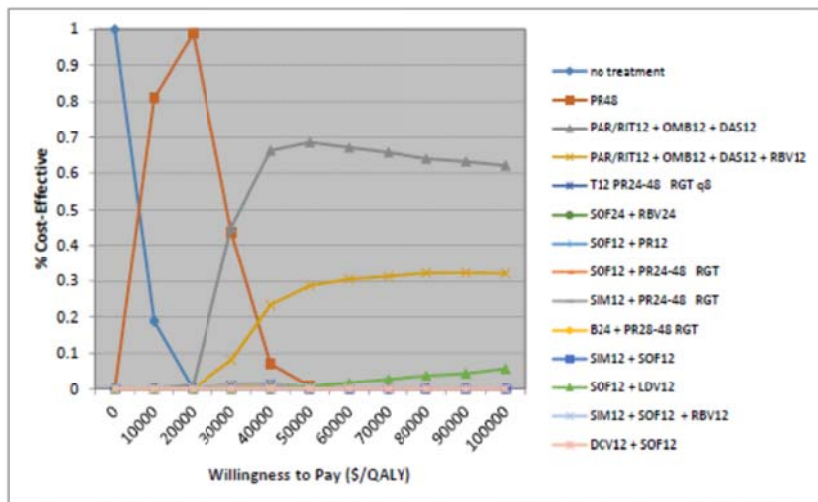

G1 Treatment Naïve Cirrhotic

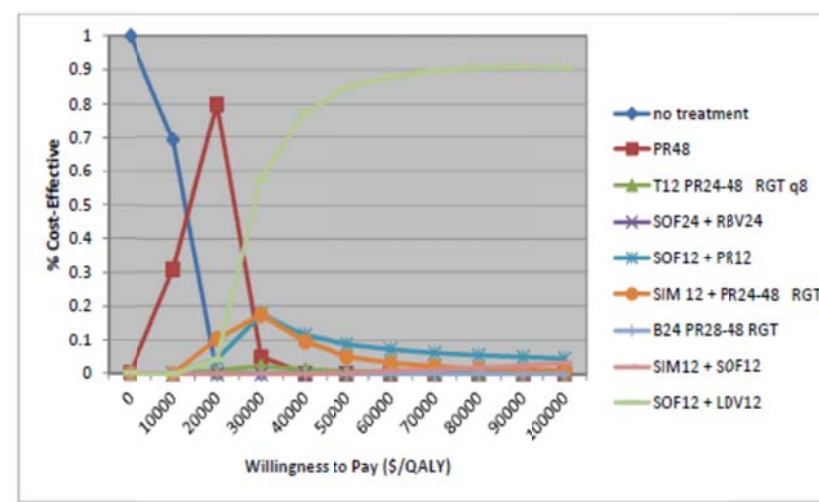

G1 Treatment Experienced Non-cirrhotic

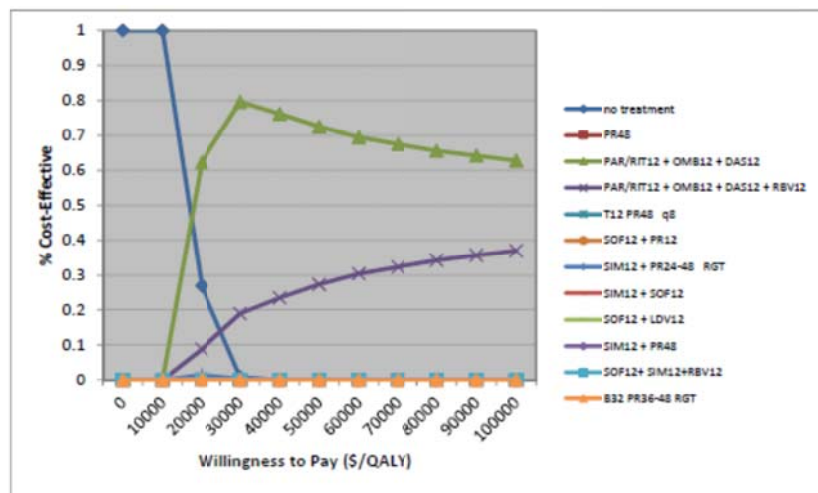

G1 Treatment Experienced Cirrhotic

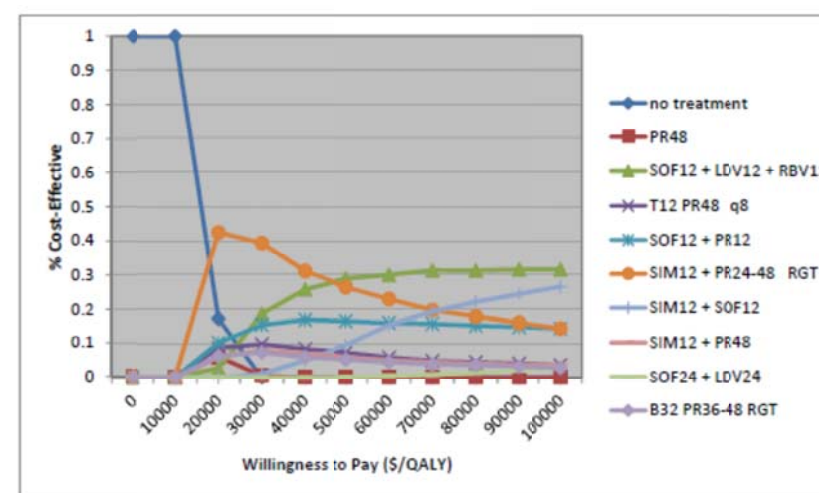

### G2 Treatment Naïve Non-cirrhotic

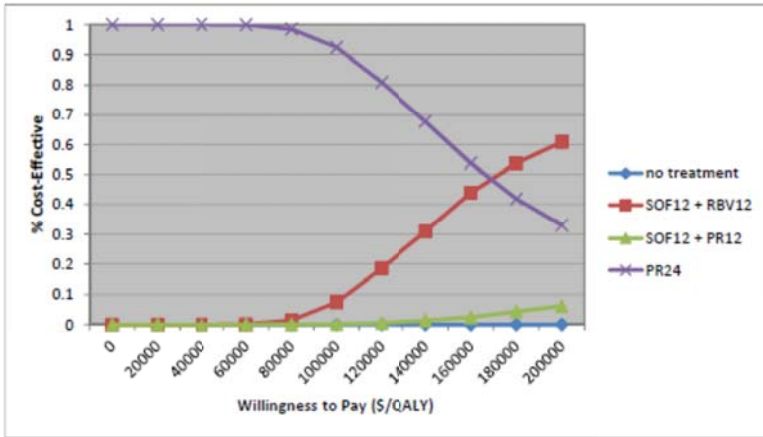

### G2 Treatment Naïve Cirrhotic

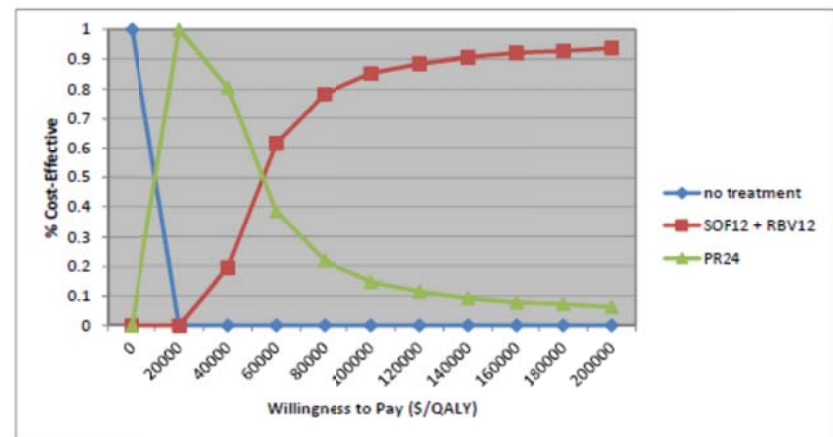

### G2 Treatment Experienced Non-cirrhotic

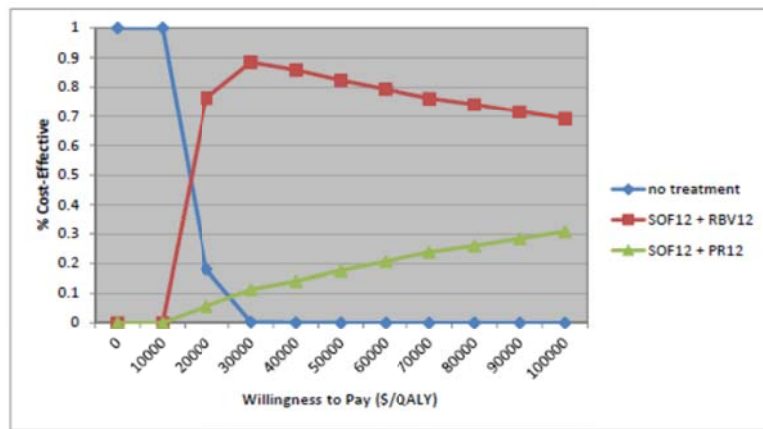

### G2 Treatment Experienced Cirrhotic

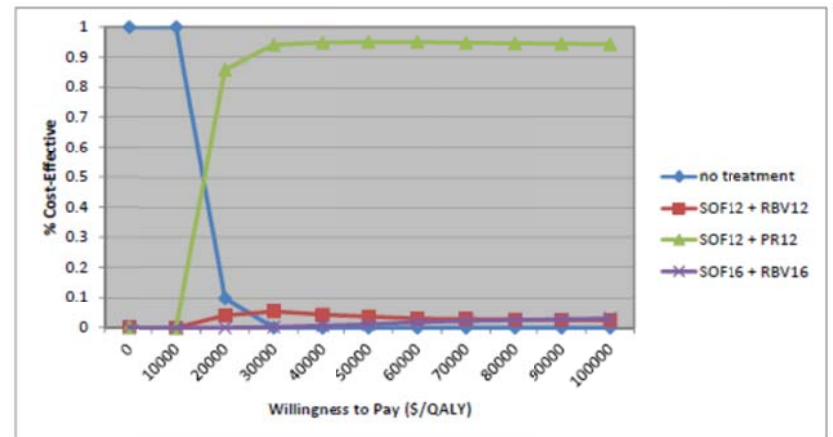

### G3 Treatment Naïve Non-cirrhotic

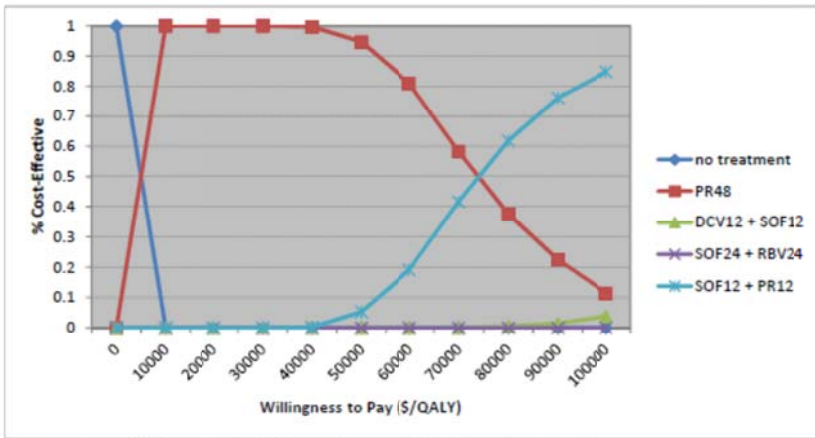

### G3 Treatment Naïve Cirrhotic

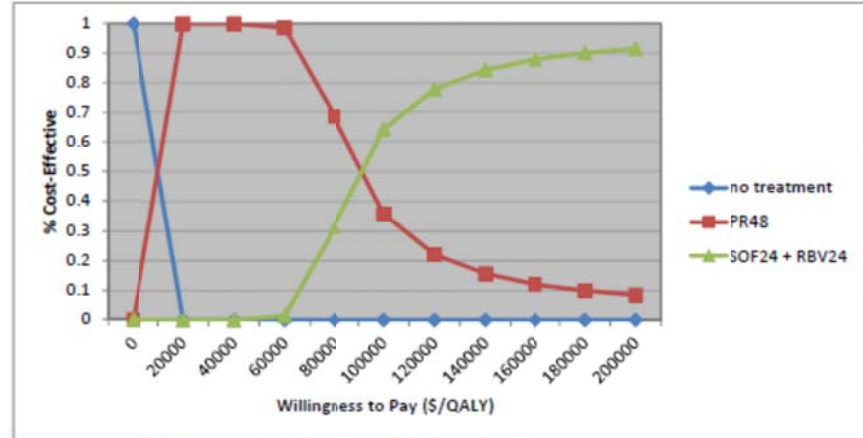

### G3 Treatment Experienced Non-cirrhotic

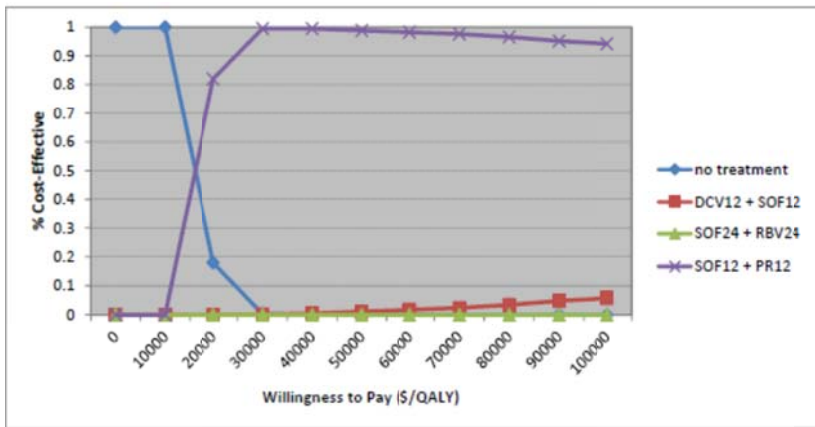

### G3 Treatment Experienced Cirrhotic

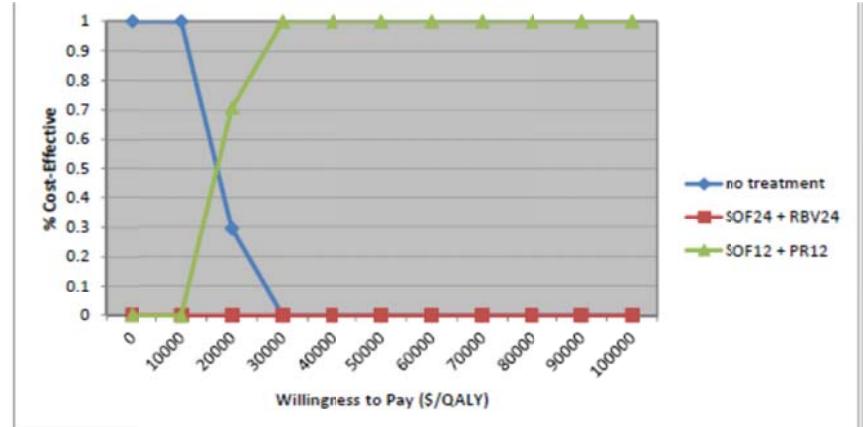

### G4 Treatment Naïve Non-cirrhotic

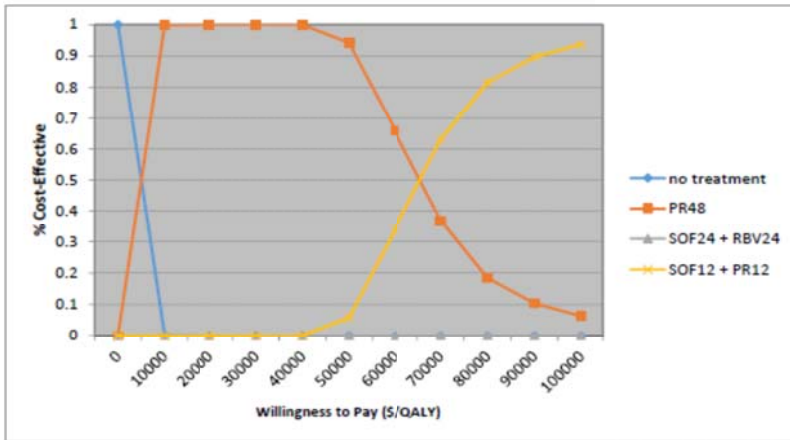

### G4 Treatment Naïve Cirrhotic

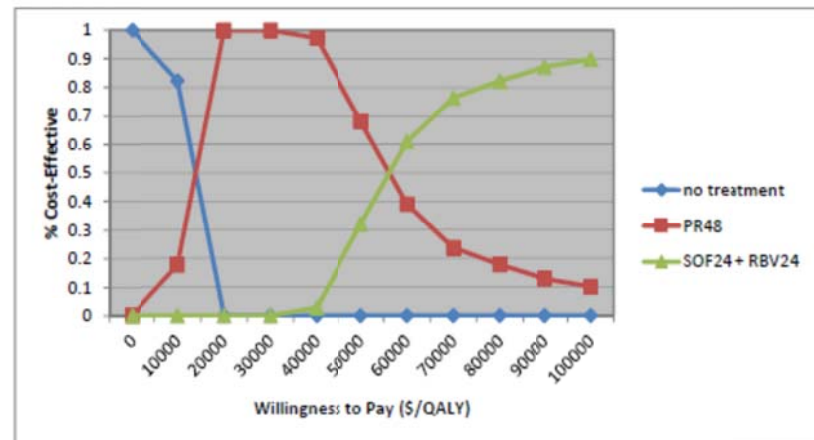

### G4 Treatment Experienced Non-cirrhotic

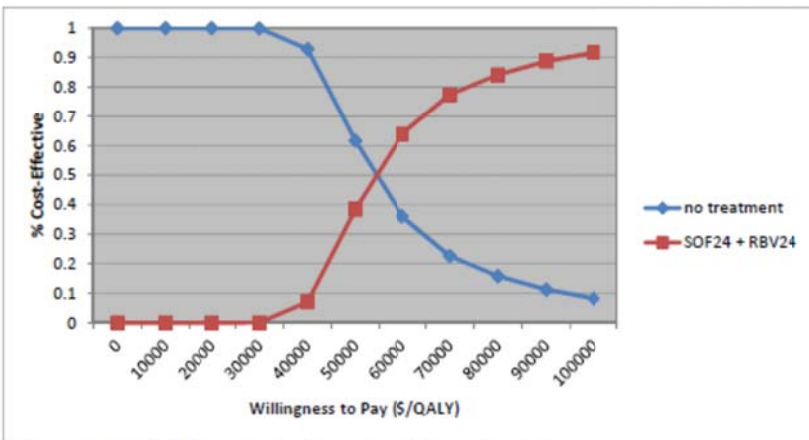

### G4 Treatment Experienced Cirrhotic

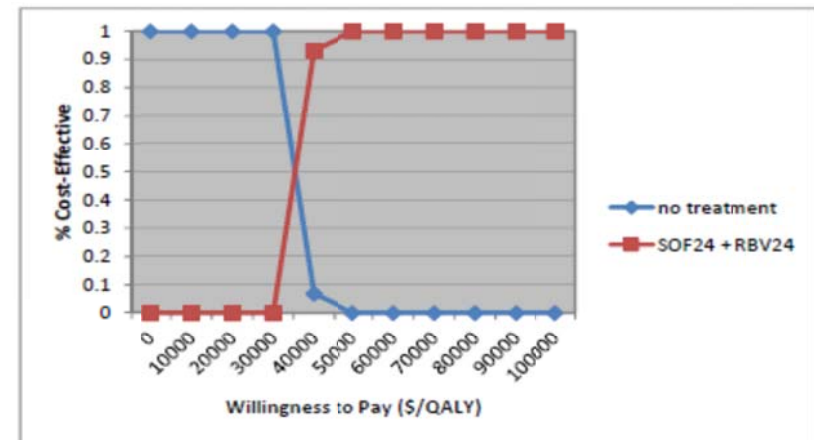

Supplement: open-2016-0161-4-at.pdf [file open-2016-0161-4-at.pdf]
